# Supplementary material for: Orogastric Exposure of Cynomolgus Macaques to Bovine HPAI H5N1 Virus Results in Subclinical Infection
Source: Research Square preprint supplement (doi:10.21203/rs.3.rs-5182487/v1), 2024-10-18
Supplement: Supplementary file 1 [file 0ab344e461a8040eedd1b775.pdf]

| Animal          |             | Day 1 & 2                           | Day 3 & 4                                              | Day 5 & 6                                              | Day 7 & 8                                           | Day 9 & 10                                          | Day 11 & 12                                         | Day 13 & 14                                         |
|-----------------|-------------|-------------------------------------|--------------------------------------------------------|--------------------------------------------------------|-----------------------------------------------------|-----------------------------------------------------|-----------------------------------------------------|-----------------------------------------------------|
| Orogastric 1    | Appearance  | Normal                              | Normal                                                 | Normal                                                 | Normal                                              | Normal                                              | Normal                                              | Normal                                              |
|                 | Appetite    | slightly decreased appetite         | decreased appetite, no/decreased stool                 | slightly decreased appetite, dry stool                 | slightly decreased appetite, decreased/normal stool | decreased appetite                                  | slightly decreased appetite, decreased/normal stool | slightly decreased appetite, decreased/normal stool |
|                 | Respiration | Normal                              | Normal                                                 | Normal                                                 | Normal                                              | Normal                                              | Normal                                              | Normal                                              |
|                 | Score       | 3/5                                 | 10/7                                                   | 3/5                                                    | 5/3                                                 | 3/5                                                 | 3/5                                                 | 5/3                                                 |
| Orogastric 2    | Appearance  | Normal                              | Normal                                                 | Normal                                                 | Normal                                              | Normal                                              | Normal                                              | Normal                                              |
|                 | Appetite    | decreased appetite, no stool        | decreased appetite, decreased stool                    | slightly decreased appetite                            | slightly decreased appetite, decreased/normal stool | slightly decreased appetite, decreased/normal stool | slightly decreased appetite, decreased/normal stool |                                                     |
|                 | Respiration | Normal                              | Normal                                                 | Normal                                                 | Normal                                              | Normal                                              | Normal                                              | Normal                                              |
|                 | Score       | 3/10                                | 10/7                                                   | 3/5                                                    | 5/3                                                 | 5/3                                                 | 5/3                                                 | 0/0                                                 |
| Orogastric 3    | Appearance  | Normal                              | Normal                                                 | Normal                                                 | Normal                                              | Normal                                              | Normal                                              | Normal                                              |
|                 | Appetite    | decreased appetite, decreased stool | decreased appetite, no/decreased stool                 | slightly decreased appetite, dry stool                 | decreased appetite                                  | slightly decreased appetite                         | slightly decreased appetite                         | slightly decreased appetite                         |
|                 | Respiration | Normal                              | Normal                                                 | Normal                                                 | Normal                                              | Normal                                              | Normal                                              | Normal                                              |
|                 | Score       | 5/7                                 | 10/7                                                   | 5/5                                                    | 5/3                                                 | 3/3                                                 | 3/3                                                 | 3/3                                                 |
| Animal          |             | Day 1 & 2                           | Day 3 & 4                                              | Day 5 & 6                                              | Day 7 & 8                                           | Day 9 & 10                                          | Day 11 & 12                                         | Day 13 & 14                                         |
| Intranasal 1    | Appearance  | Normal                              | Possible rectal bleeding*                              | Normal                                                 | Normal                                              | Normal                                              | Normal                                              | Normal                                              |
|                 | Appetite    | decreased appetite, decreased stool | decreased appetite, no stool                           | decreased appetite, decreased stool                    | decreased appetite, decreased stool                 | decreased appetite, decreased stool                 | decreased appetite, decreased stool                 | decreased appetite, decreased stool                 |
|                 | Respiration | Normal                              | Normal                                                 | Normal                                                 | Normal                                              | Increased                                           | Increased                                           | Normal                                              |
|                 | Score       | 5/7                                 | 10/22                                                  | 7/7                                                    | 7/7                                                 | 7/12                                                | 7/7                                                 | 5/5                                                 |
| Intranasal 2    | Appearance  | Normal                              | Normal                                                 | Normal                                                 | Normal                                              | Normal                                              | Normal                                              | Normal                                              |
|                 | Appetite    | decreased appetite, decreased stool | decreased appetite, no stool                           | decreased appetite, decreased stool                    | decreased appetite, no/decreased stool              | severely decreased appetite, decreased/mucoid stool | decreased appetite, decreased stool                 | slightly decreased appetite, no/normal stool        |
|                 | Respiration | Normal                              | Normal                                                 | Normal                                                 | Increased                                           | Increased                                           | Increased                                           | Normal                                              |
|                 | Score       | 5/7                                 | 10/10                                                  | 7/7                                                    | 10/12                                               | 12/17                                               | 12/12                                               | 8/3                                                 |
| Intranasal 3    | Appearance  | Normal                              | Normal                                                 | Normal                                                 | Normal                                              | Normal                                              | Normal                                              | Normal                                              |
|                 | Appetite    | decreased appetite, decreased stool | decreased appetite, no stool                           | decreased appetite, decreased stool                    | decreased appetite, decreased/normal stool          | decreased appetite                                  | slightly decreased appetite, normal/decreased stool | slightly decreased/normal appetite                  |
|                 | Respiration | Normal                              | Normal                                                 | Normal                                                 | Normal                                              | Normal                                              | Normal                                              | Normal                                              |
|                 | Score       | 3/7                                 | 8/7                                                    | 3/5                                                    | 5/5                                                 | 5/3                                                 | 3/5                                                 | 3/0                                                 |
| Animal          |             | Day 1 & 2                           | Day 3 & 4                                              | Day 5 & 6                                              | Day 7 & 8                                           | Day 9 & 10                                          | Day 11 & 12                                         | Day 13 & 14                                         |
| Intratracheal 1 | Appearance  | Normal,                             | Normal                                                 | Normal                                                 | Weak, using cage for support                        | N/A                                                 | N/A                                                 | N/A                                                 |
|                 | Appetite    | decreased appetite, normal/no stool | severely decreased appetite, decreased urine, no stool | severely decreased appetite, decreased urine, no stool | severely decreased, no stool                        | N/A                                                 | N/A                                                 | N/A                                                 |
|                 | Respiration | Normal                              | Increased                                              | Increased                                              | Open mouth breathing                                | N/A                                                 | N/A                                                 | N/A                                                 |
|                 | Score       | 5/10                                | 10/22                                                  | 17/15                                                  | 45/euthanized                                       | N/A                                                 | N/A                                                 | N/A                                                 |
| Intratracheal 2 | Appearance  | Normal                              | Normal                                                 | Normal                                                 | Severely hunched posture                            | N/A                                                 | N/A                                                 | N/A                                                 |
|                 | Appetite    | decreased appetite, decreased stool | decreased appetite, no stool                           | severely decreased appetite, no stool                  | severely decreased appetite, no stool               | N/A                                                 | N/A                                                 | N/A                                                 |
|                 | Respiration | Normal                              | Normal                                                 | Increased                                              | Open mouth breathing                                | N/A                                                 | N/A                                                 | N/A                                                 |
|                 | Score       | Score 3/7                           | Score 10/10                                            | Score 10/15                                            | Score 25/euthanized*                                | N/A                                                 | N/A                                                 | N/A                                                 |
| Intratracheal 3 | Appearance  | Normal                              | Blood around nares                                     | Blood around nares                                     | Bloody nose                                         | N/A                                                 | N/A                                                 | N/A                                                 |
|                 | Appetite    | decreased appetite, no stool        | decreased stool, severely decreased appetite           | decreased/no stool, severely decreased appetite        | open mouth breathing, decreased appetite, no stool  | N/A                                                 | N/A                                                 | N/A                                                 |
|                 | Respiration | Normal                              | Increased                                              | Increased                                              | open mouth breathing                                | N/A                                                 | N/A                                                 | N/A                                                 |
|                 | Score       | Score 5/10                          | Score 10/22                                            | Score 17/20                                            | Score 45/euthanized                                 | N/A                                                 | N/A                                                 | N/A                                                 |

Supplemental Figure 1

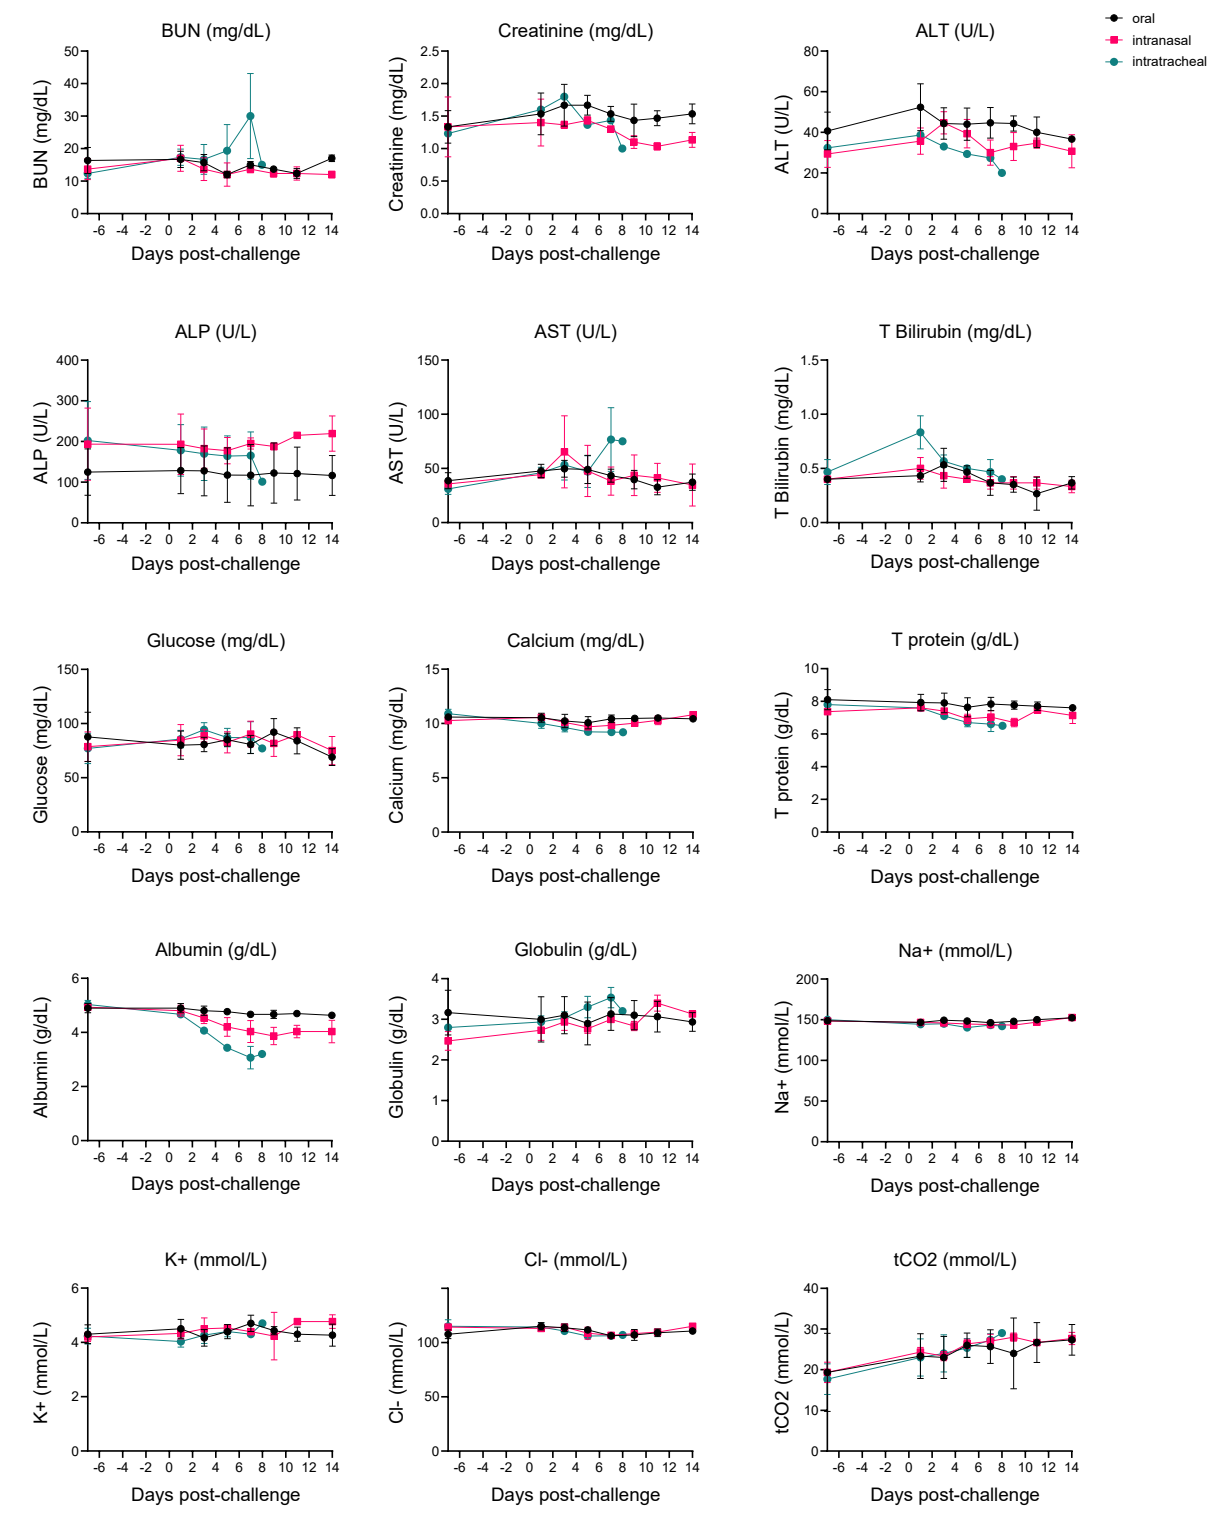

**Supplemental Figure 1: Blood Chemistries in cynomolgus macaques inoculated with HPAIV H5N1.**

Serum was collected at each clinical exam and at the time of euthanasia and blood chemistry analysis was performed to assess organ function over the course of the study. Data represent 3 animals per inoculation route.

Supplemental Figure 2

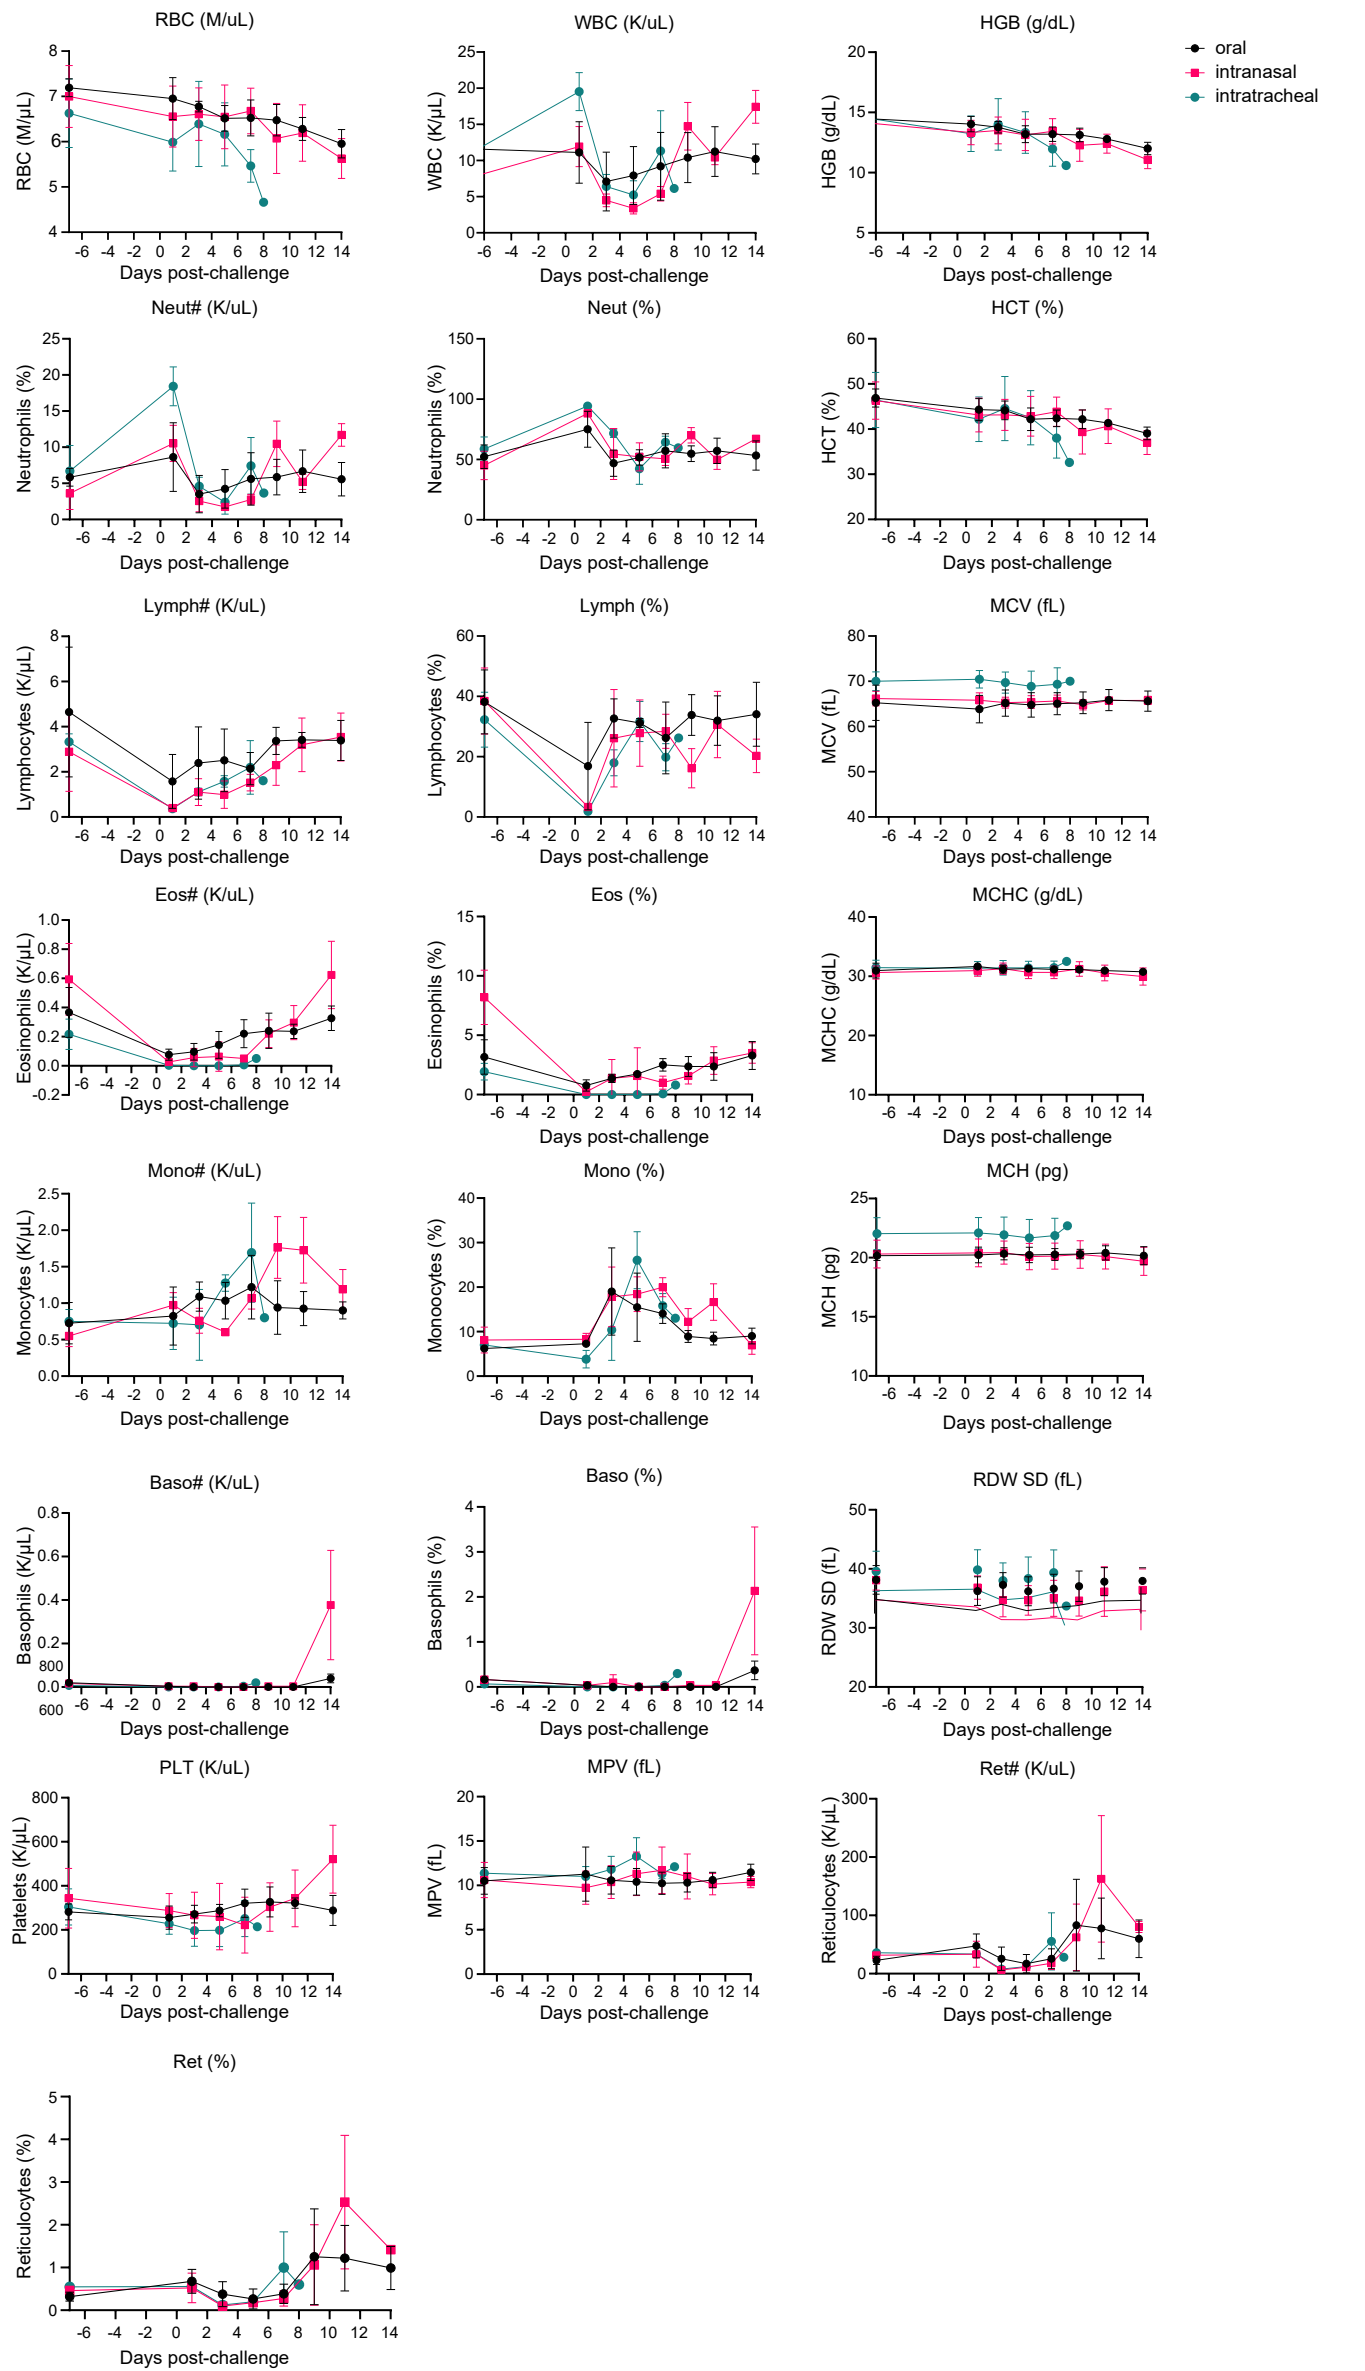

**Supplemental Figure 2: Hematological changes in cynomolgus macaques inoculated with HPAIV**

**H5N1.** Whole blood was collected at each clinical exam and at the time of euthanasia to assess the effects of inoculation over the course of the study. Data represent 3 animals per route.

Supplemental Figure 3

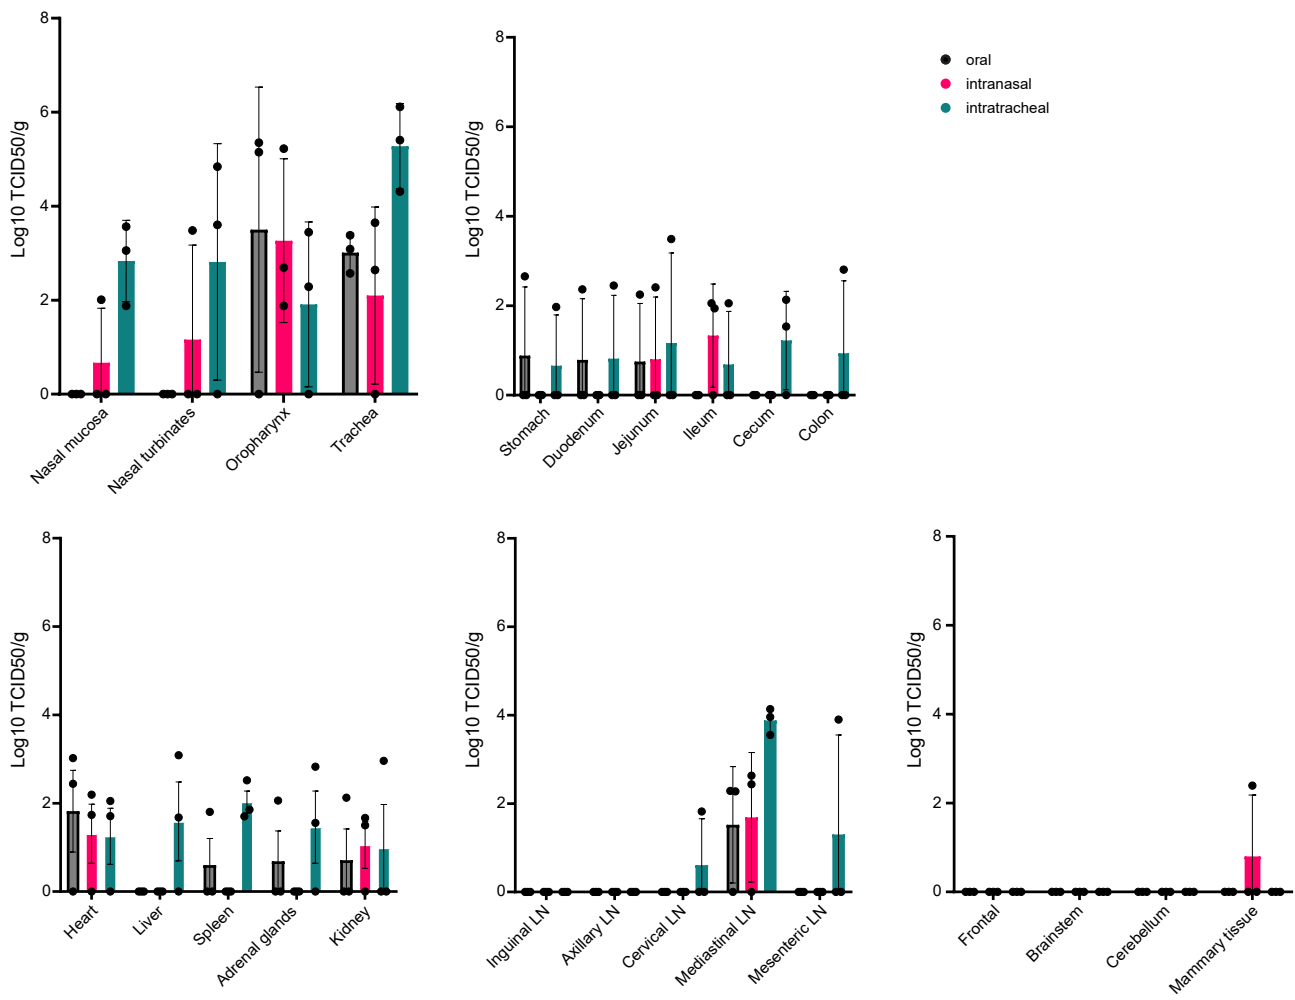

**Supplemental Figure 3: Virus titers in tissues of cynomolgus macaques inoculated with HPAIV H5N1.** Three animals per inoculation route were euthanized on D4/D5 and infectious virus was measured in tissues.

Supplemental Figure 4

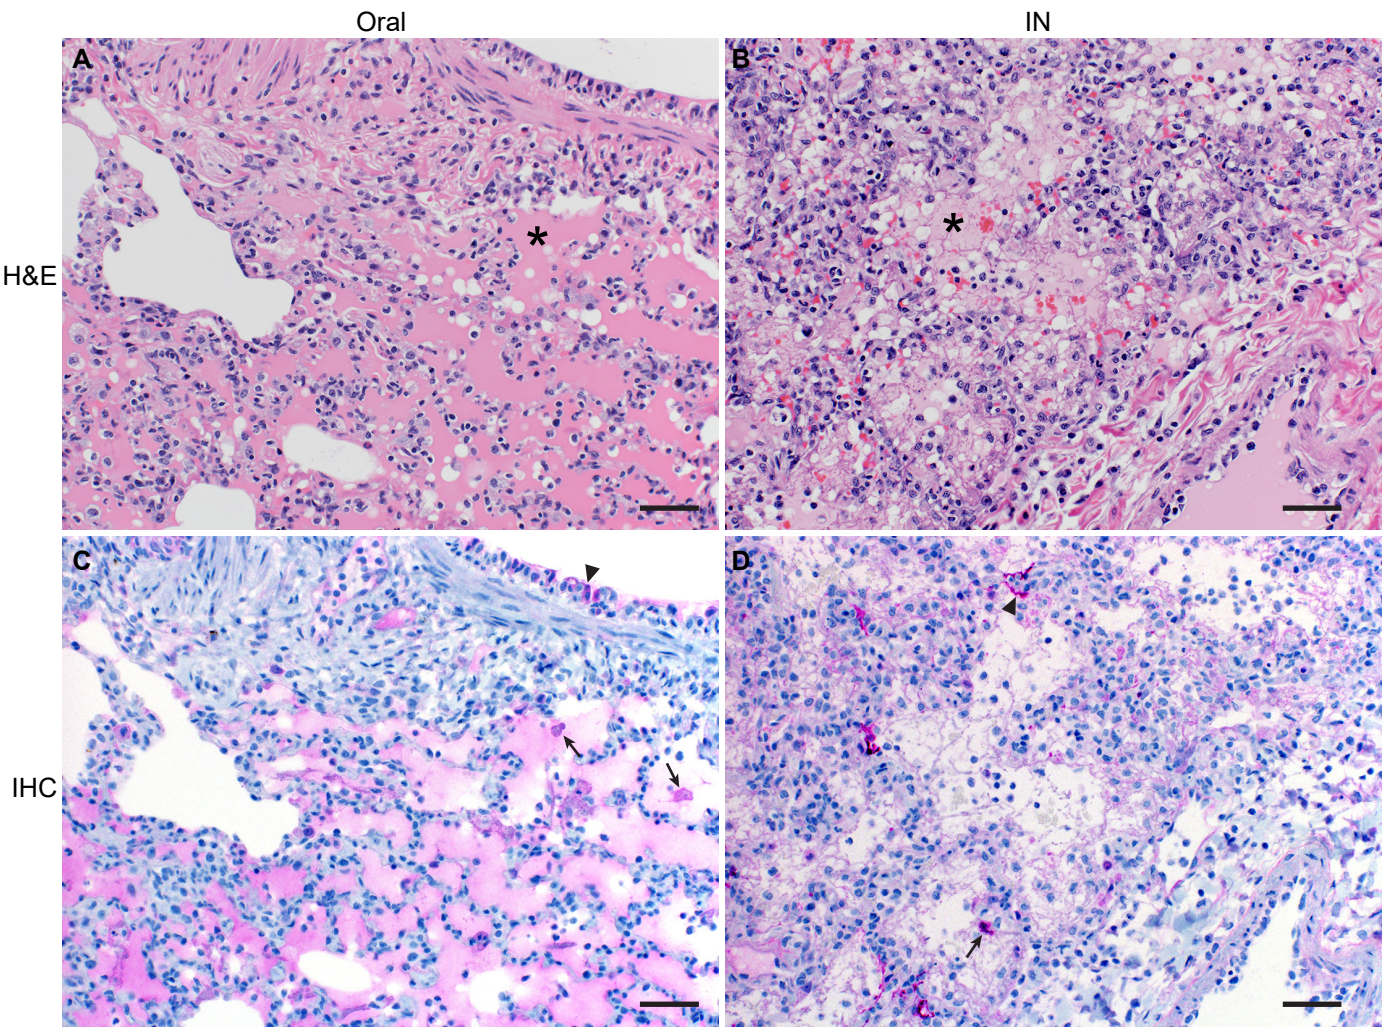



**Supplemental Figure 4: Rare histologic lesions in lungs of cynomolgus macaques inoculated with HPAIV via the orogastric or intranasal route during Acute Disease.** Pulmonary lesions were observed in two lobes of one orogastric and one lobe in two intranasally inoculated animals euthanized on D5. Mild signs of pneumonia were observed with limited macrophage and neutrophil infiltration. HE: Asterisk = edema, IHC: Arrows = macrophages, arrowhead = bronchiolar epithelium. 200X; bar = 50 $\mu$ m.

Supplemental Figure 5

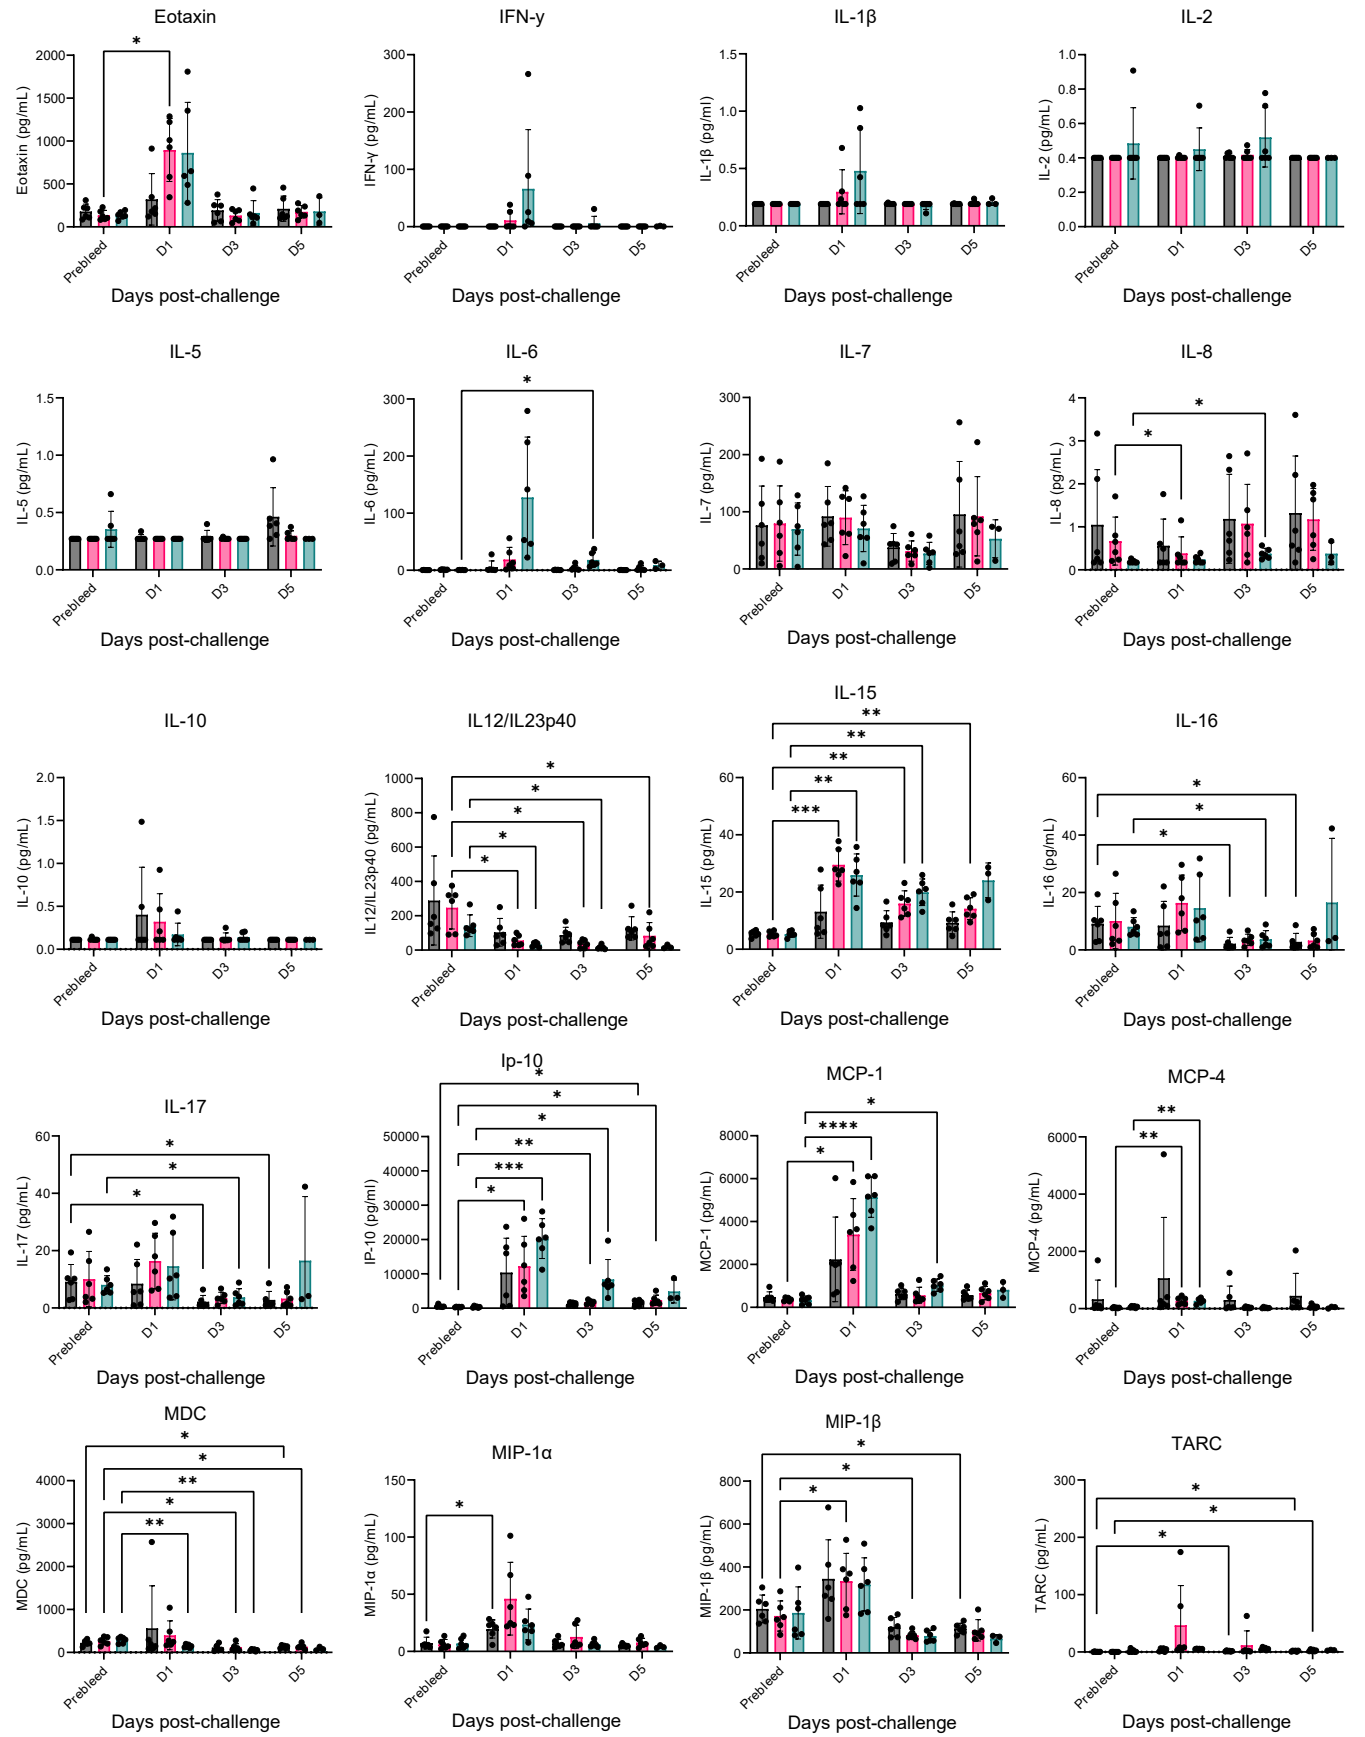

**Supplemental Figure 5: Cytokine and Chemokine levels in the blood of cynomolgus macaques inoculated with HPAIV H5N1.** Serum was collected from all animals (n=6 per inoculation route) during the first 5 days of the study to compare cytokine and chemokine levels across the three inoculation groups. Statistical analysis was performed with a mixed-effects model (Dunnett's multiple comparison test) with multiple comparisons. \* = P-value <0.05, \*\* = P-value <0.01, \*\*\* = P-value <0.001, \*\*\*\* = P-value <0.0001
